# Supplementary material for: Genetic Variation in DEAD-Box Helicase 20 as a Putative Marker of Recurrence in Propensity-Matched Colon Cancer Patients
Source: MDPI journal article supplement (doi:10.3390/genes13081404), 2022-08-07
Supplement: s1 [file s1]

**Supplementary Table S1.** Transcript isoforms of *DDX20* gene

| Transcript ID     | Name             | bp   | Protein    | Biotype                 |
|-------------------|------------------|------|------------|-------------------------|
| ENST00000369702.5 | <b>DDX20-201</b> | 3600 | 824 aa     | Protein coding          |
| ENST00000679724.1 | DDX20-209        | 4658 | 824 aa     | Protein coding          |
| ENST00000680627.1 | DDX20-216        | 3322 | 754 aa     | Protein coding          |
| ENST00000680518.1 | DDX20-215        | 2817 | 423 aa     | Protein coding          |
| ENST00000681559.1 | DDX20-220        | 5375 | 279 aa     | Nonsense mediated decay |
| ENST00000533164.6 | <b>DDX20-204</b> | 3226 | 138 aa     | Nonsense mediated decay |
| ENST00000679576.1 | DDX20-208        | 3153 | 193 aa     | Nonsense mediated decay |
| ENST00000680936.1 | DDX20-217        | 3076 | 294 aa     | Nonsense mediated decay |
| ENST00000680383.1 | DDX20-213        | 2755 | 345 aa     | Nonsense mediated decay |
| ENST00000679498.1 | DDX20-207        | 7416 | No protein | Retained intron         |
| ENST00000679774.1 | DDX20-210        | 7183 | No protein | Retained intron         |
| ENST00000534200.2 | <b>DDX20-205</b> | 4697 | No protein | Retained intron         |
| ENST00000475700.1 | <b>DDX20-202</b> | 4332 | No protein | Retained intron         |
| ENST00000680415.1 | DDX20-214        | 4322 | No protein | Retained intron         |
| ENST00000681747.1 | DDX20-221        | 3818 | No protein | Retained intron         |
| ENST00000680038.1 | DDX20-211        | 3810 | No protein | Retained intron         |
| ENST00000681529.1 | DDX20-219        | 3522 | No protein | Retained intron         |
| ENST00000680317.1 | DDX20-212        | 3486 | No protein | Retained intron         |
| ENST00000679381.1 | DDX20-206        | 3422 | No protein | Retained intron         |
| ENST00000680983.1 | DDX20-218        | 2688 | No protein | Retained intron         |
| ENST00000524894.2 | <b>DDX20-203</b> | 894  | No protein | Retained intron         |

Data source: Ensemble Genome Browser ([www.ensembl.org](http://www.ensembl.org)). The bold isoforms are transcribed in colon adenocarcinoma.

**Table S2.** Gene ontology and pathway analysis of *DDX20* gene

| GO domain          | Accession                   | GO term                                                              |
|--------------------|-----------------------------|----------------------------------------------------------------------|
| Molecular Function | <a href="#">GO:0003676</a>  | Nucleic acid-binding                                                 |
|                    | <a href="#">GO:0003677</a>  | DNA binding                                                          |
|                    | <a href="#">GO:0004004</a>  | ATP-dependent RNA helicase activity                                  |
|                    | <a href="#">GO:0004386</a>  | Helicase activity                                                    |
|                    | <a href="#">GO:0005515</a>  | Protein binding                                                      |
|                    | <a href="#">GO:0005524</a>  | ATP binding                                                          |
|                    | <a href="#">GO:0019904</a>  | Protein domain-specific binding                                      |
|                    | <a href="#">GO:0042826</a>  | Histone deacetylase binding                                          |
| Biological Process | <a href="#">GO:0000122</a>  | Negative regulation of transcription from RNA polymerase II promoter |
|                    | <a href="#">GO:0000244</a>  | Spliceosomal tri-snRNP complex assembly                              |
|                    | <a href="#">GO:0000387</a>  | Spliceosomal snRNP assembly                                          |
|                    | <a href="#">GO:0006200</a>  | ATP catabolic process                                                |
|                    | <a href="#">GO:0006396</a>  | RNA processing                                                       |
|                    | <a href="#">GO:0008152</a>  | Metabolic process                                                    |
|                    | <a href="#">GO:0010467</a>  | Gene expression                                                      |
|                    | <a href="#">GO:0016070</a>  | RNA metabolic process                                                |
|                    | <a href="#">GO:0034660</a>  | ncRNA metabolic process                                              |
|                    | <a href="#">GO:0043065</a>  | Positive regulation of the apoptotic process                         |
|                    | <a href="#">GO:0045892</a>  | Negative regulation of transcription, DNA-templated                  |
|                    | <a href="#">GO:0048477</a>  | Oogenesis                                                            |
|                    | <a href="#">GO:0050810</a>  | Regulation of steroid biosynthetic process                           |
| Cellular Component | <a href="#">GO:0005634</a>  | Nucleus                                                              |
|                    | <a href="#">GO:0005654</a>  | Nucleoplasm                                                          |
|                    | <a href="#">GO:0005737</a>  | Cytoplasm                                                            |
|                    | <a href="#">GO:0005829</a>  | Cytosol                                                              |
|                    | <a href="#">GO:0005856</a>  | Cytoskeleton                                                         |
|                    | <a href="#">GO:0016020</a>  | Membrane                                                             |
|                    | <a href="#">GO:0017053</a>  | Transcriptional repressor complex                                    |
|                    | <a href="#">GO:0032797</a>  | SMN complex                                                          |
|                    | <a href="#">GO:0034719</a>  | SMN-Sm protein complex                                               |
|                    | <a href="#">GO:0097504</a>  | Gemini of coiled bodies                                              |
| REACTOME           | <a href="#">REACT_11066</a> | snRNP Assembly pathway                                               |
|                    | <a href="#">REACT_11052</a> | Metabolism of non-coding RNA pathway                                 |
|                    | <a href="#">REACT_71</a>    | Gene Expression pathway                                              |
| KEGG               | <a href="#">hsa03013</a>    | RNA transport pathway                                                |

Data source: InnateDB (<http://www.innatedb.com/>).
